# Supplementary material
Source: PubMed Central journal article supplement (PMC4003566)
Supplement: NIHMS572446-supplement-01.pdf [file NIHMS572446-supplement-01.pdf]

## NMR structures of the human $\alpha 7$ nAChR transmembrane domain and associated anesthetic binding sites

Vasyl Bondarenko,<sup>1</sup> David D. Mowrey,<sup>1,3</sup> Tommy S. Tillman,<sup>1</sup> Edom Seyoum<sup>1</sup>, Yan Xu<sup>1,2,4</sup>, Pei Tang,<sup>1,3,4</sup>

<sup>1</sup>Department of Anesthesiology, <sup>2</sup>Department of Structural Biology, and <sup>3</sup>Department of Computational & Systems Biology, <sup>4</sup>Department of Pharmacology & Chemical Biology, University of Pittsburgh School of Medicine

|     | TM1                     |            |            |            |            |            | TM2                     |  |  |  |  |  |  |
|-----|-------------------------|------------|------------|------------|------------|------------|-------------------------|--|--|--|--|--|--|
|     | 212                     | 222        | 232        | 242        | 252        | 262        | 272                     |  |  |  |  |  |  |
| WT  | SNARRTLYYG              | LNLLIPCVLI | SALALLVFLI | PADSGEKISL | GITVLLSLTV | FMLLVAEIMP | ATSDSVPLIA              |  |  |  |  |  |  |
| NMR | SN <del>AE</del> EELYYG | LNLLIPCVLI | SALALLVFLI | PADSGEKISL | GITVLLSLTV | FMLLVAEIMP | STSDS <del>SP</del> SIA |  |  |  |  |  |  |
|     | 10                      | 20         | 30         | 40         | 50         | 60         | 70                      |  |  |  |  |  |  |
|     | TM3                     |            |            |            |            |            | TM4                     |  |  |  |  |  |  |
|     | 282                     | 292        | 302        | 447        | 457        | 467        |                         |  |  |  |  |  |  |
| WT  | QYFASTMIIV              | GLSVVTVIV  | LQYHHHDPDG | GK-----VDR | LCLMAFSVFT | IICTIGILMS | APNFV--                 |  |  |  |  |  |  |
| NMR | QYFASTMIIV              | GLSVVTVIV  | LQYHHHDPDG | GEGGGEGIDR | LCLMAFSVFT | IICTIGILMS | APNFVEE                 |  |  |  |  |  |  |
|     | 80                      | 90         | 100        | 110        | 120        | 130        |                         |  |  |  |  |  |  |

**Fig. S1.** The amino acid sequences of the wild-type TM domain (**WT**) of the human  $\alpha 7$  nAChR and the  $\alpha 7$  TM domain used in our NMR study (**NMR**) with the mutated sites highlighted. The residue numbering for each sequence is shown above and below the sequences, respectively. To convert the residue numbering used in the NMR study to the numbering for the full-length  $\alpha 7$  AChR, add 202 for residues labeled 1 to 102 and add 337 for residues labeled 103 to 137.

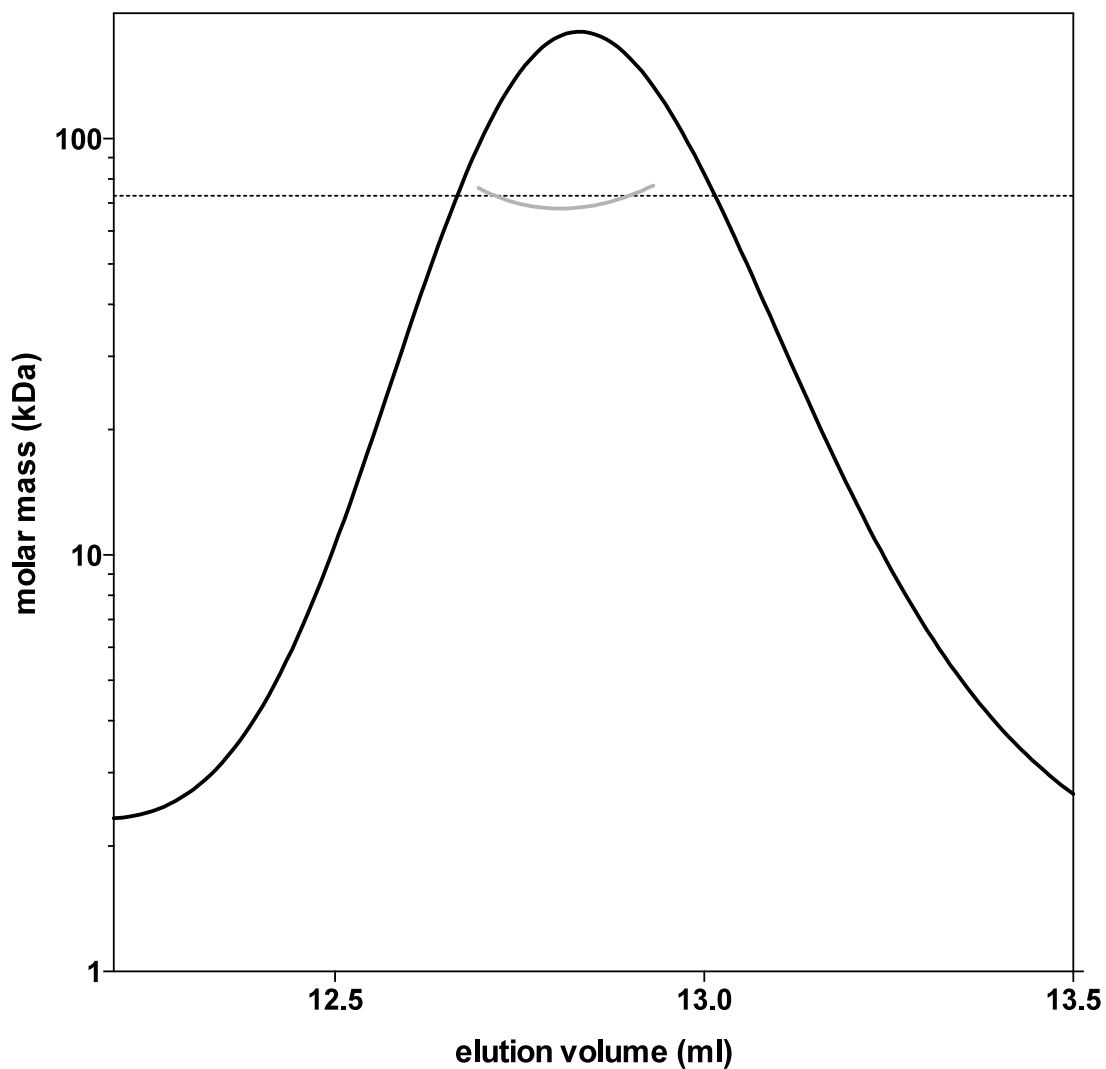

**Fig. S2.** Size exclusion chromatography-multi-angle light scattering analysis indicated the formation of a  $\alpha 7$  TM domain pentamer. The molar mass (gray) of the  $\alpha 7$  TM domain was calculated from conjugate analysis of the protein-detergent complex and is shown across the UV elution peak (black) after size exclusion chromatography. The average molar mass of the  $\alpha 7$  TM domain assembly was 71.2 kDa. The dotted line indicates the expected molar mass of 72.9 kDa.

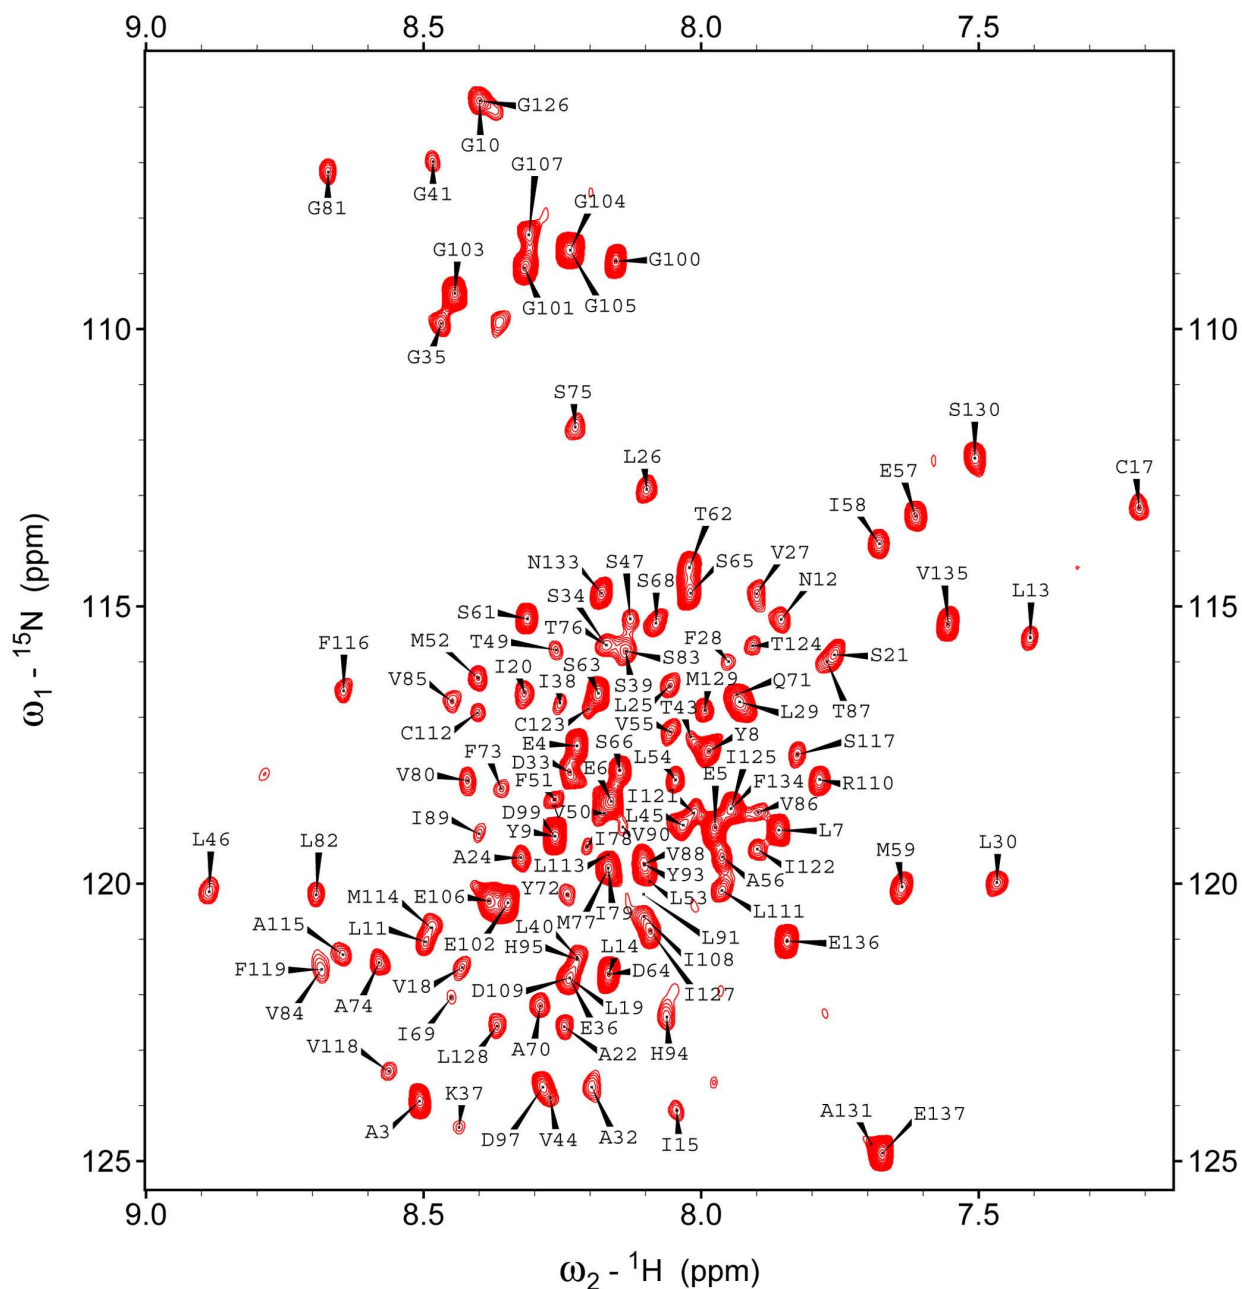

**Fig. S3.**  $^1\text{H}$ - $^{15}\text{N}$  TROSY-HSQC spectrum of the TM domain of the human  $\alpha 7$  nAChR. The NMR sample contained 0.25 mM  $\alpha 7$ , 60 mM LDAO detergent, 5 mM sodium acetate pH 4.7, 10 mM NaCl, and 20 mM 2-mercaptoethanol to prevent disulfide bond formation. The NMR spectrum was acquired at 900 MHz and 45 °C. The peak assignment is shown with the one-letter amino acid code and the sequence number. To convert the numbering in the spectra to the numbering for the full-length  $\alpha 7$  nAChR, add 202 for residues labeled 1 to 102 and add 337 for residues labeled 103 to 137.



numbering used in the NMR study to the numbering for the full-length  $\alpha 7$  AChR, add 202 for residues labeled 1 to 102 and add 337 for residues labeled 103 to 137.

**Table S1.** Statistics for the bundle of 20 calculated structures of the TM domain of the human  $\alpha 7$  nAChR.

| <i>NMR structure</i>                                                                                             | <i>Statistics</i>           |
|------------------------------------------------------------------------------------------------------------------|-----------------------------|
| Number of distance restraints                                                                                    | 614                         |
| Intraresidue ( $ i - j  = 0$ )                                                                                   | 239                         |
| Short range ( $ i - j  = 1$ )                                                                                    | 223                         |
| Medium range ( $1 <  i - j  \leq 4$ )                                                                            | 109                         |
| Long-range, inter-helical ( $ i - j  \geq 5$ )                                                                   | 43                          |
| Number of dihedral angle restraints<br>(Residues 4-15, 17-29, 34, 36-58, 69-93, 107-130)                         | 196                         |
| Number of hydrogen bond restraints<br>(Residues 4-8, 10-22, 24-25, 35-41, 43-47, 49-54, 69-89, 107-119, 121-125) | 152×2                       |
| Number of upper limit restraints violations $> 0.5 \text{ \AA}$                                                  | 0                           |
| Number of dihedral angle restraints violations $> 5^\circ$                                                       | 0                           |
| Backbone RMSD (Residues 5-29, 36-58, 69-93, 107-130)                                                             | $1.24 \pm 0.32 \text{ \AA}$ |
| Heavy atom RMSD (Residues 5-29, 36-58, 69-93, 107-130)                                                           | $1.64 \pm 0.30 \text{ \AA}$ |
| Ramachandran plot                                                                                                |                             |
| Residues in most favored regions                                                                                 | 86.2 %                      |
| Residues in additionally allowed regions                                                                         | 13.6 %                      |
| Residues in generously allowed regions                                                                           | 0.1 %                       |
| Residues in disallowed regions                                                                                   | 0.1 %                       |

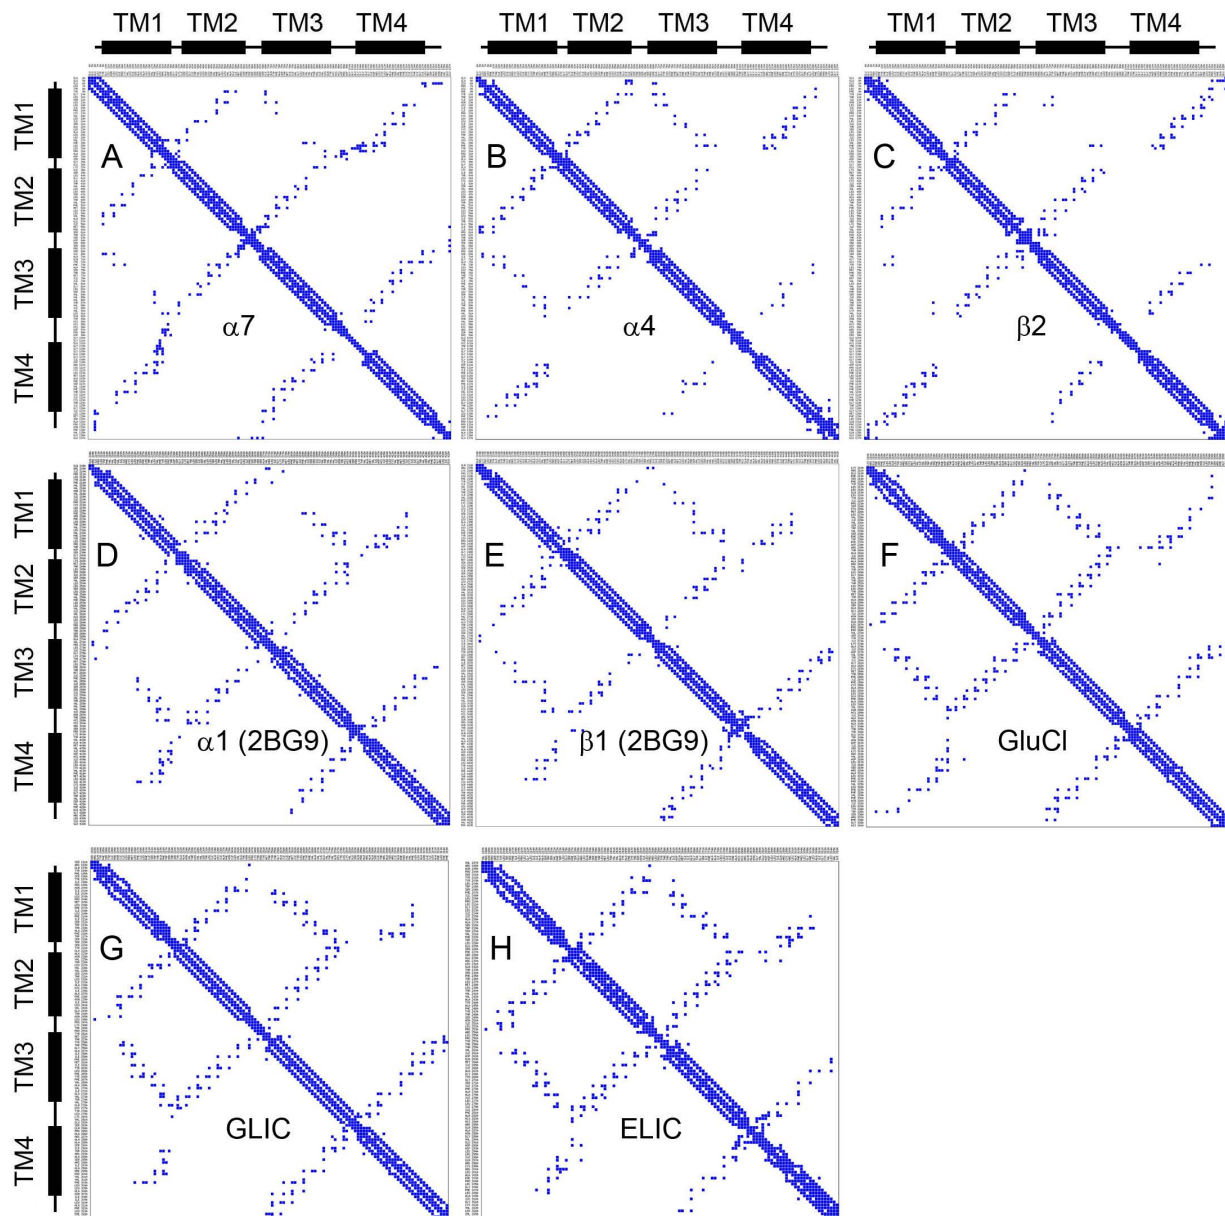

**Fig. S5.** Comparisons of contact maps for the TM domain structures of (A)  $\alpha 7$  (PDB ID: 2MAW), (B)  $\alpha 4$  (PDB ID: 2LLY), and (C)  $\beta 2$  (PDB ID: 2LM2) in LDAO micelles, (D)  $\alpha 1$  and (E)  $\beta 1$  of the *Torpedo* nAChR (PDB ID: 2BG9), (F) GluCl (PDB ID: 3RHW), (G) GLIC (PDB ID: 3EAM), and (H) ELIC (PDB ID: 2VL0). All protein structures show contact maps typical for four-helix bundle structures, but some differences are observed. For example,  $\alpha 7$  shows more contacts between TM1 and TM3 than  $\beta 2$  but less than the other proteins. Also, there are some contacts between the TM1 – TM2 loop and the TM3 – TM4 loop in  $\alpha 7$  that are not present in  $\alpha 4$  and  $\beta 2$ .

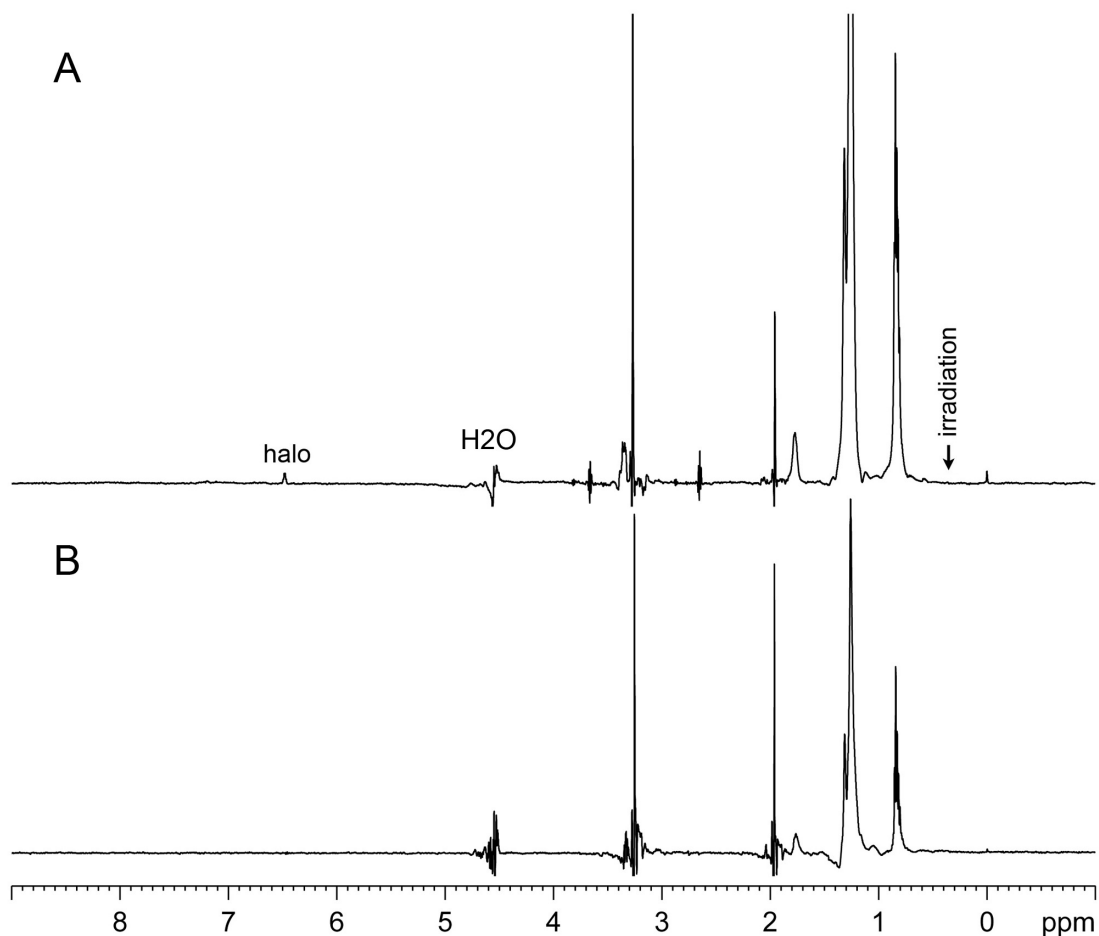

**Fig. S6.** 1D saturation transfer difference (STD) NMR confirms direct interaction between halothane and the TM domain of the human  $\alpha 7$  nAChR. The STD spectra of 3.2 mM halothane in 60 mM LDAO detergent in (A) the presence and (B) the absence of the 0.25 mM  $\alpha 7$  TM domain. The spectra were acquired at 600 MHz and 45 °C with the same NMR parameters. A 10 s saturation time and a 12 s relaxation delay were used. The on- and off-resonance frequencies for saturation were set at 0.4 ppm and 25 ppm, respectively. The anesthetic signal (6.48 ppm) was observed only in the  $\alpha 7$  STD spectrum confirming that the halothane signal result from direct anesthetic interactions with the protein. The peaks around 0.83, 1.26, 1.32, 1.77, 3.27, and 3.34 ppm were residual signals of LDAO.



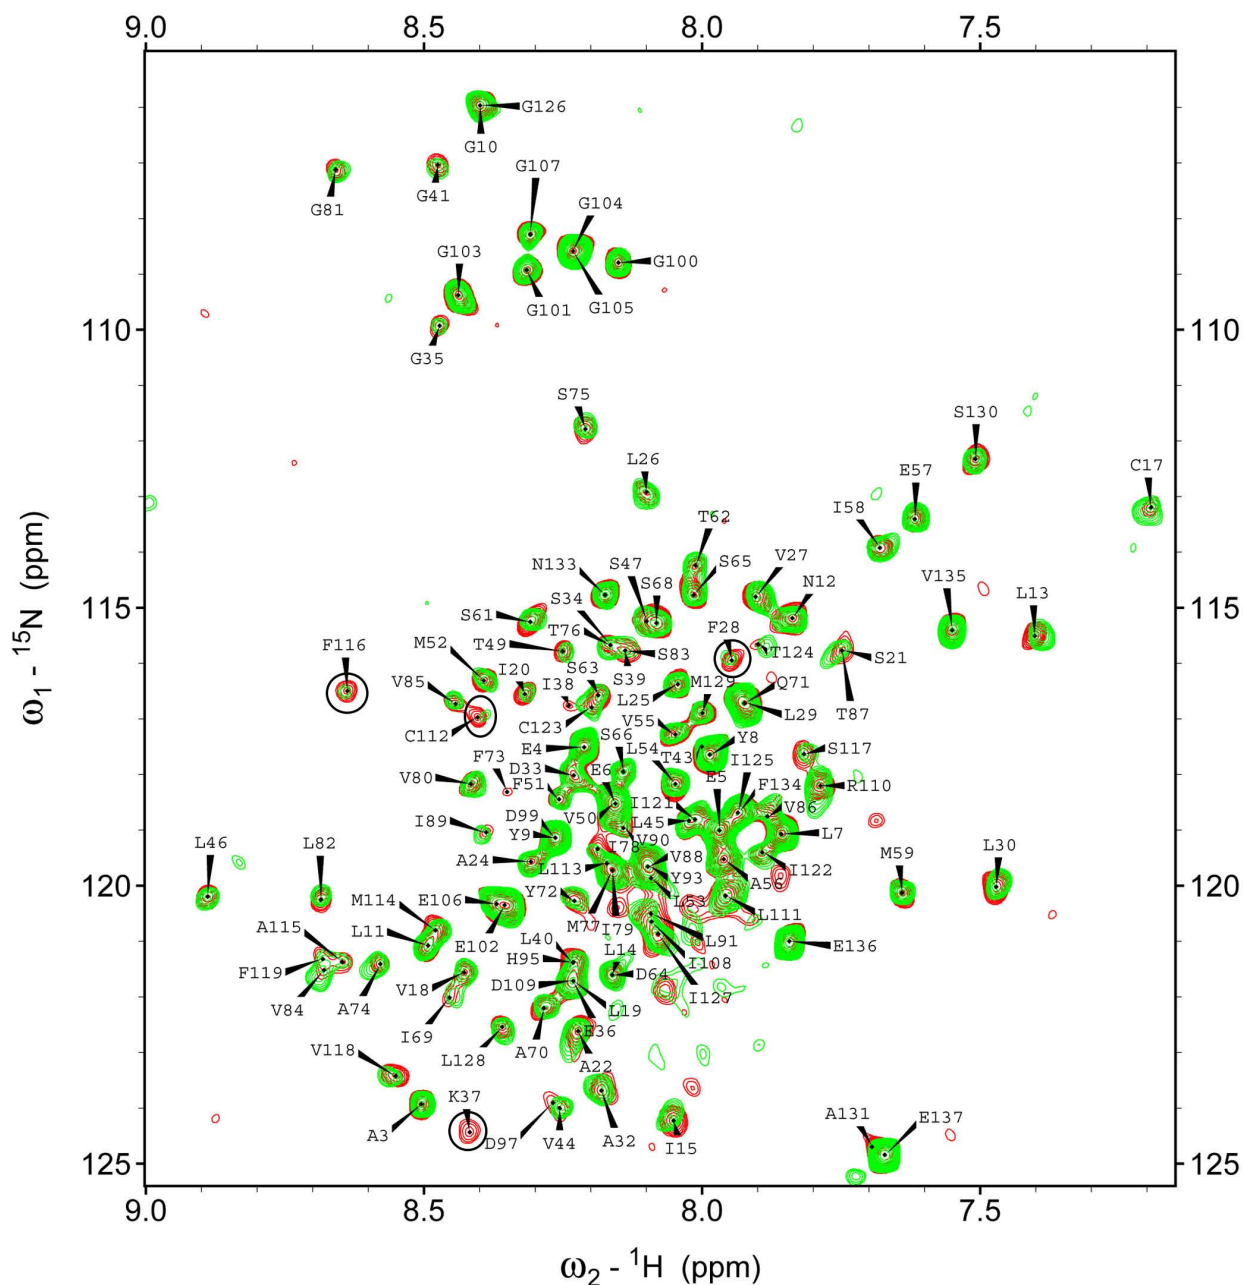

**Fig. S7.** 2D saturation transfer NMR demonstrates direct interaction between halothane and the specific residues of the TM domain of the human  $\alpha 7$  nAChR. Overlay of 2D saturation transfer spectra of the  $\alpha 7$  TM domain with (green) and without (red) saturation of the proton resonance of halothane (3.2 mM). The spectra were acquired at 600 MHz and 45 °C. The peak assignment is shown with the one-letter amino acid code and the sequence number. The residues directly interacting with the anesthetic revealed significant decreasing in peak intensity upon the halothane peak saturation and are labeled with ovals. To convert the numbering in the spectra to the numbering for the full-length  $\alpha 7$  nAChR, add 202 for residues labeled 1 to 102 and add 337 for residues labeled 103 to 137.



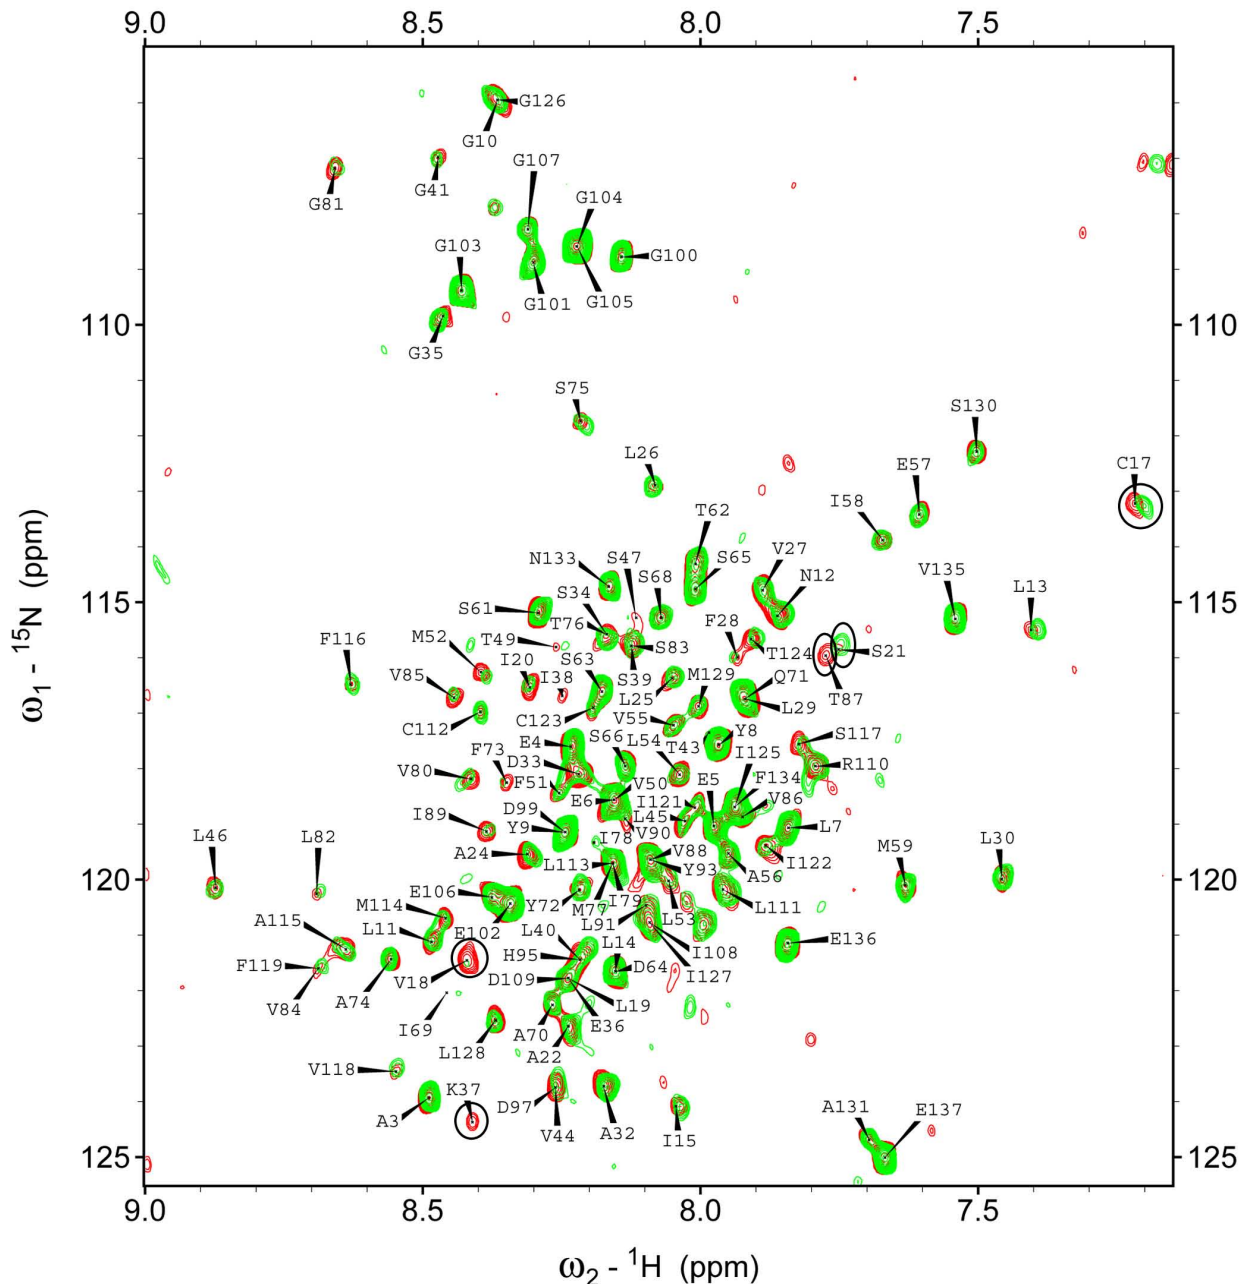

**Fig. S8.** Halothane effects on the TM domain of the human  $\alpha 7$  nAChR. Overlay of  $^1\text{H}$ - $^{15}\text{N}$  TROSY-HSQC spectra of the  $\alpha 7$  TM domain in the absence (red) and the presence (green) of 1.7 mM halothane. The spectra were acquired at 600 MHz and 45 °C. The peak assignment is shown with the one-letter amino acid code and the sequence number. The residues significantly affected by the anesthetic are marked with ovals. To convert the numbering in the spectra to the numbering for the full-length  $\alpha 7$  nAChR, add 202 for residues labeled 1 to 102 and add 337 for residues labeled 103 to 137.

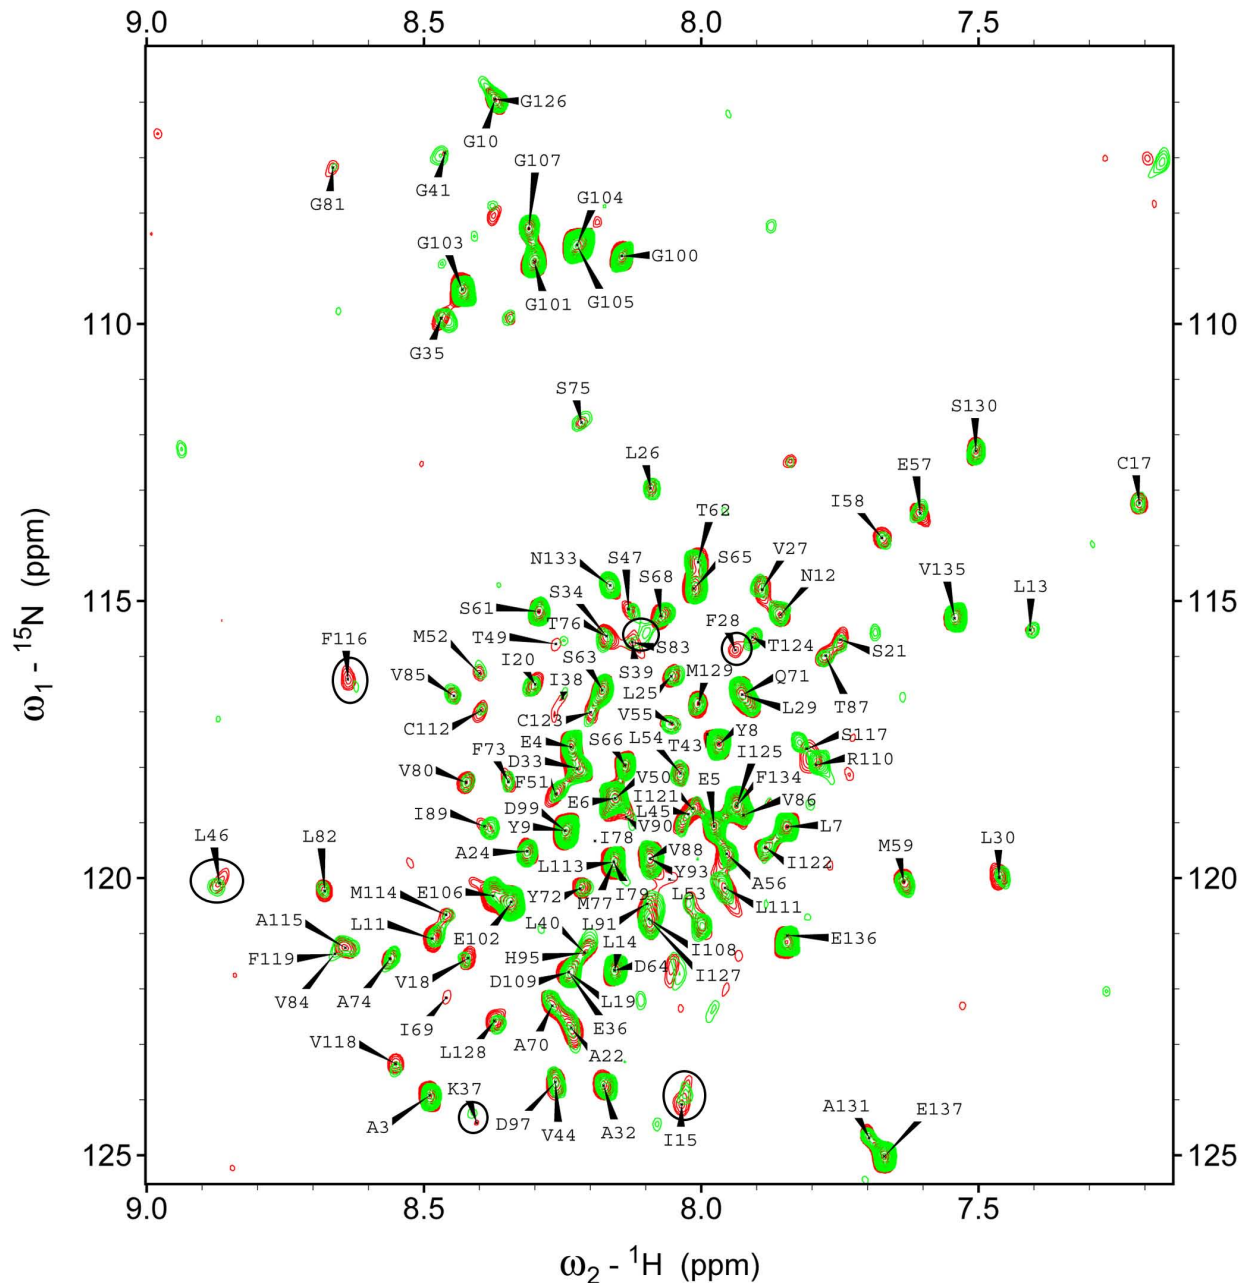

**Fig. S9.** Ketamine effects on the TM domain of the human  $\alpha 7$  nAChR. Overlay of  $^1\text{H}$ - $^{15}\text{N}$  TROSY-HSQC spectra of the  $\alpha 7$  TM domain in the absence (red) and the presence (green) of 80  $\mu\text{M}$  ketamine. The spectra were acquired at 600 MHz and 45  $^\circ\text{C}$ . The peak assignment is shown with the one-letter amino acid code and the sequence number. The residues significantly affected by the anesthetic are marked with ovals. To convert the numbering in the spectra to the numbering for the full-length  $\alpha 7$  nAChR, add 202 for residues labeled 1 to 102 and add 337 for residues labeled 103 to 137.

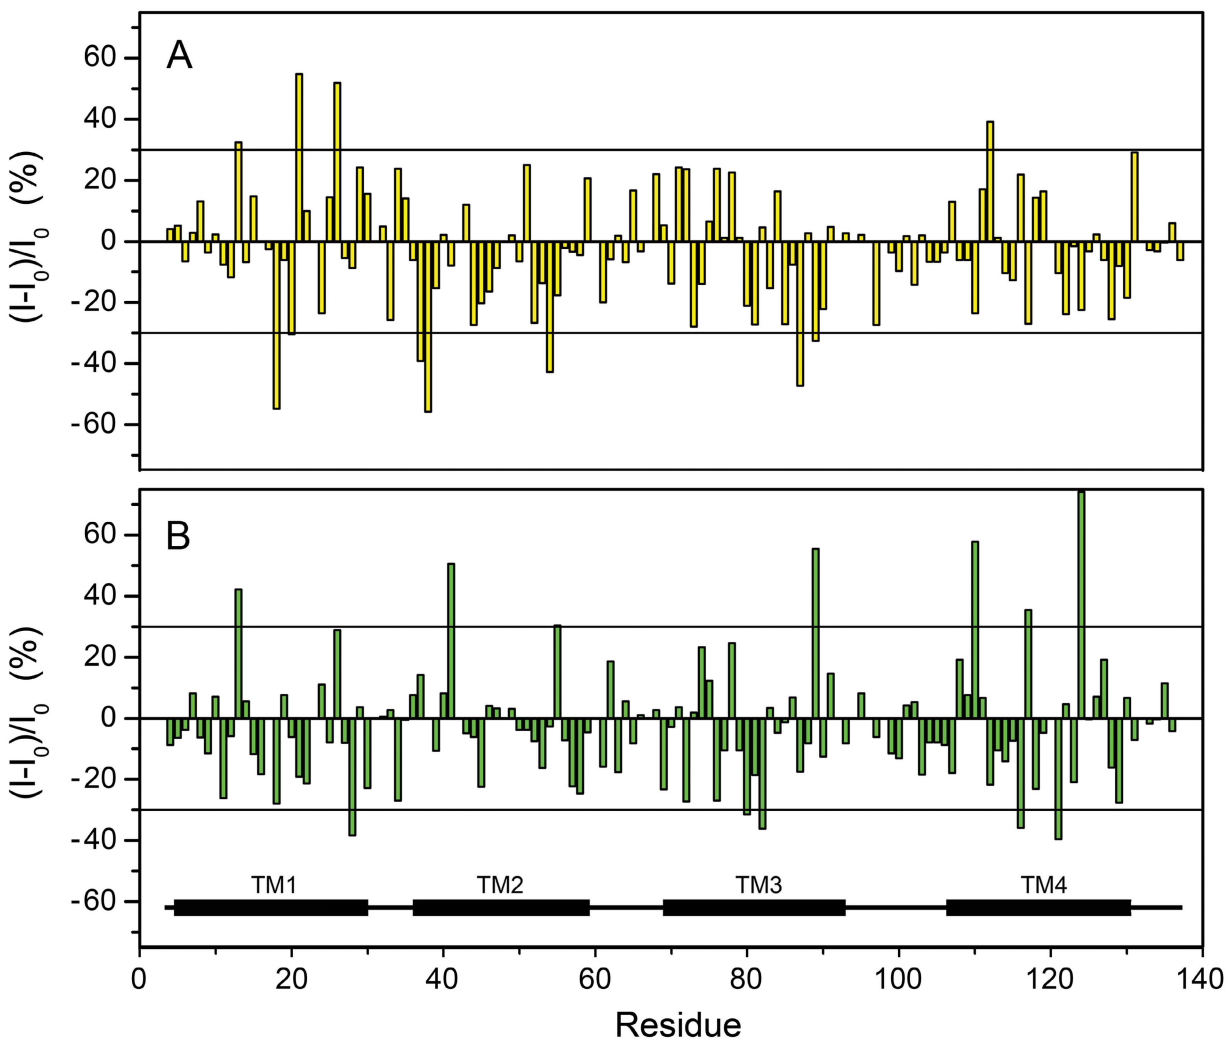

**Fig. S10.** Anesthetics modulate backbone dynamics of the TM domain of the human  $\alpha 7$  nAChR. Relative changes in peak intensity of the  $\alpha 7$  TM domain induced by (A) halothane (1.7 mM) and (B) ketamine (80  $\mu$ M) versus the residue number. Residues significantly affected by halothane included L13, S21, L26, and C112 (peak intensity increased) as well as V18, I20, K37, I38, L54, T87, and I89 (peak intensity decreased). The ketamine binding affected the following residues: L13, G41, I89, R110, S117, and T124 (peak intensity increased) as well as F28, V80, L82, F116, and I121 (peak intensity decreased). To convert the numbering in this figure to the numbering for the full-length  $\alpha 7$  nAChR, add 202 for residues labeled 1 to 102 and add 337 for residues labeled 103 to 137.
